# Supplementary material for: Feasibility and Repeatability of Handheld Optical Coherence Tomography in Children With Craniosynostosis
Source: PubMed Central journal article supplement (PMC8322722; doi:10.1167/tvst.10.8.24), 2021-07-27

**Supplementary Figure S1: Successful ONH scan in patient with left corneal scar.** This was achieved by tilting the handheld OCT probe around the corneal scar to visualise the ONH. OCT = optical coherence tomography; ONH = optic nerve head.

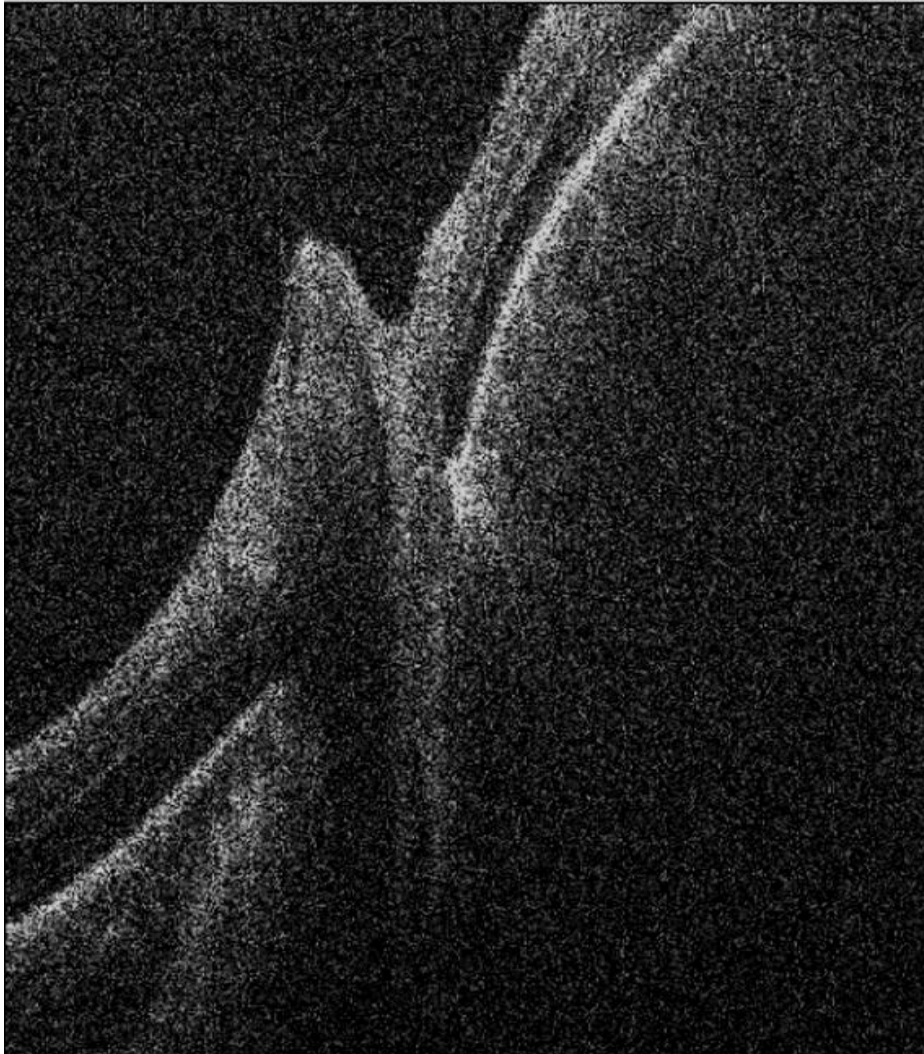

Supplement: tvst-10-8-24_s001.pdf [file tvst-10-8-24_s001.pdf]
